# Supplementary material
Source: PubMed Central journal article supplement (PMC2083728)
Supplement: archdisch_92_5_416__1.pdf [file archdisch_92_5_416__1.pdf]

**Supplemental Table 1 Databases Searched**

|                                                                  |
|------------------------------------------------------------------|
| MEDLINE                                                          |
| MEDLINE In Process                                               |
| EMBASE                                                           |
| CINAHL                                                           |
| PsycInfo                                                         |
| SIGLE (System for Information on Grey Literature)                |
| Sociological Abstracts                                           |
| LILACS (Latin American and Caribbean Health Sciences Literature) |
| NHS Economic Evaluation Database                                 |
| DARE (Database of Abstracts of Reviews of Effects)               |
| HTA database                                                     |
| Pascal                                                           |
| SciSearch                                                        |
| Dissertation Abstracts                                           |
| Inside Conferences                                               |
| Science and Technology Proceedings                               |
| Cochrane Controlled Trials Register                              |
| National Research Register                                       |
| OHE Health Economic Evaluations Database                         |
| metaRegister of Clinical Trials                                  |
| OMNI                                                             |
| Economic Working Papers Archive                                  |
| Google                                                           |
| Copernic                                                         |

**Supplemental Table 2: Results of quality assessment for the five diagnostic accuracy studies that assessed BMI, weight, or skin fold measures in comparison with an accepted reference standard for determining percentage body fat**

| Study Details                      | Were selection criteria clearly described? | Did the whole sample or a random selection of the sample, receive verification using a reference standard of diagnosis? | Did patients receive the same reference standard regardless of the index test result? | Was the reference independent of the index test (i.e. the index test did not form part of the reference standard)? | Was the execution of the index test described in sufficient detail to permit replication of the test? | Was the execution of the reference standard described in sufficient detail to permit its replication? | Were the index test results interpreted without knowledge of the results of the reference standard? | Were the reference standard results interpreted without knowledge of the results of the index test? | Were uninterpretable/intermediate test results reported? | Were withdrawals from the study explained? | Was the cut-off threshold predefined for the index test? | Was the cut-off threshold predefined for the reference standard? |
|------------------------------------|--------------------------------------------|-------------------------------------------------------------------------------------------------------------------------|---------------------------------------------------------------------------------------|--------------------------------------------------------------------------------------------------------------------|-------------------------------------------------------------------------------------------------------|-------------------------------------------------------------------------------------------------------|-----------------------------------------------------------------------------------------------------|-----------------------------------------------------------------------------------------------------|----------------------------------------------------------|--------------------------------------------|----------------------------------------------------------|------------------------------------------------------------------|
| Ellis(1999) <sup>13</sup>          | ✗                                          | ✓                                                                                                                       | ✓                                                                                     | ✓                                                                                                                  | ✓                                                                                                     | ✓                                                                                                     | ?                                                                                                   | ?                                                                                                   | ?                                                        | ✓                                          | ?                                                        | ✗                                                                |
| Himes(1989) <sup>14</sup>          | ✗                                          | ✓                                                                                                                       | ✓                                                                                     | ✓                                                                                                                  | ✗                                                                                                     | ✗                                                                                                     | ?                                                                                                   | ?                                                                                                   | ✗                                                        | ✗                                          | ✓                                                        | ✓                                                                |
| Lazarus(1996) <sup>15</sup>        | ✓                                          | ✓                                                                                                                       | ✓                                                                                     | ✓                                                                                                                  | ✓                                                                                                     | ✓                                                                                                     | ?                                                                                                   | ?                                                                                                   | ✗                                                        | ✗                                          | ?                                                        | ✓                                                                |
| Marshall(1991) <sup>16</sup>       | ✓                                          | ✓                                                                                                                       | ✓                                                                                     | ✓                                                                                                                  | ✓                                                                                                     | ✓                                                                                                     | ?                                                                                                   | ?                                                                                                   | ?                                                        | ✓                                          | ✓                                                        | ✓                                                                |
| Wickramasinghe(2005) <sup>21</sup> | ✗                                          | ✓                                                                                                                       | ✓                                                                                     | ✓                                                                                                                  | ✓                                                                                                     | ✓                                                                                                     | ?                                                                                                   | ?                                                                                                   | ✓                                                        | ✓                                          | ✓                                                        | ✓                                                                |
